# Supplementary material
Source: publisher site journal article supplement (https://www.dovepress.com/article/542118)
Supplement: Supplementary file 1 [file 542118_Supplementary%20Material.pdf]

**Supplementary Table 1.** List of Investigative Sites

| S.No. | Site Name                           |
|-------|-------------------------------------|
| 1     | Access Eye                          |
| 2     | Albany Regional Eye Surgery Center  |
| 3     | Allied Physician Surg Ctr           |
| 4     | Amelia Island Surgery Center        |
| 5     | American Eye Surgery Center         |
| 6     | American Surg Ctr of S TX           |
| 7     | Avon Surgery Center LLC             |
| 8     | BDP - Flagstaff                     |
| 9     | BDP - Phoenix                       |
| 10    | BDP - Sedona                        |
| 11    | Beltway Surgery Ctr Springmill      |
| 12    | Birmingham Outpatient Surg Ctr      |
| 13    | Brecksville Surgery Center          |
| 14    | Camp Lowell Surgery Center          |
| 15    | Carondelet Foothills Surgery Center |
| 16    | Central NY Eye Ctr                  |
| 17    | Chesapeake Eye Surgery Center       |
| 18    | Clarkston ASC Partners LLC          |
| 19    | Clearview Surgery Center            |
| 20    | CLI SURGERY CENTER                  |
| 21    | Doctors Outpatient Surgery Center   |
| 22    | Eastern Orange ASC                  |
| 23    | El Paso Day Surgery, LLC            |
| 24    | Evergreen Eye Center- Federal Way   |
| 25    | Eye Academy Am Grand Junction       |

|    |                                   |
|----|-----------------------------------|
| 26 | Eye Surgery Center Ltd            |
| 27 | Eye Surgery Center of Tulsa       |
| 28 | Eye Surgery Ctr of GA             |
| 29 | Eye Surgi CTRs Carolinas          |
| 30 | Eye Surgical Center               |
| 31 | Eyesight Laser and Surgery Center |
| 32 | Family Surgery Center             |
| 33 | Florissant Surgery Center         |
| 34 | Freedom Vision Surgery Center     |
| 35 | Gainesville Eye Center            |
| 36 | Glenbrook Hospital                |
| 37 | Hallandale Outpatient Surg Ctr    |
| 38 | Hartford Hospital Eye Center      |
| 39 | Hawaiian Eye Center               |
| 40 | HFHS Lakeside                     |
| 41 | Highsmith Rainey Hospital         |
| 42 | Idaho Eye Center                  |
| 43 | Insight Surgery Center LLC        |
| 44 | Jackson Madison County            |
| 45 | Kernersville Medical Center       |
| 46 | Lexington Surgery Center          |
| 47 | Lind Eyecare                      |
| 48 | Nashua Eye Surgery Center         |
| 49 | North Coast Surgery Center        |
| 50 | North Georgia Eye Clinic          |
| 51 | North Kitsap Ambulatory Srg Ctr   |
| 52 | North Shore Same Day Surgery      |

|    |                                      |
|----|--------------------------------------|
| 53 | Novamed Eyecare - Atlanta            |
| 54 | Ophthalmology Surgery Center         |
| 55 | Oregon Eye Surgery Center            |
| 56 | Palisades Eye Surgery Center         |
| 57 | Palm Beach Outpatient Surg CTR       |
| 58 | Park Hill Surgery CTR LLC            |
| 59 | Physicians Surgery Center of Downey  |
| 60 | Richens Eye Center                   |
| 61 | Rocky Hill ASC LLC                   |
| 62 | Rush Surgicenter Ltd                 |
| 63 | Salem ASC LLC                        |
| 64 | Santa Barbara Surgery Center         |
| 65 | Scripps Encinitas Surgery Center     |
| 66 | Scripps Mercy Ambulatory             |
| 67 | SIEHT Falkenberg Eye & Laser Center  |
| 68 | Southwestern Eye Center - Cottonwood |
| 69 | Southwestern Eye Ctr - Casa Grande   |
| 70 | Specialist Surgery Center of Del Mar |
| 71 | St Lucy's Outpatient Surgery Center  |
| 72 | Staten Island Univ Hospital          |
| 73 | Surgery Center of Kalamazoo          |
| 74 | Surgery Center of Plano              |
| 75 | Surgery Center of Weston LLC         |
| 76 | SurgiSite Boston                     |
| 77 | Texas Eye and Laser Center           |
| 78 | The Surg Center of N Central OH LLC  |
| 79 | UCLA - Jules Stein Eye Institute     |

|    |                                     |
|----|-------------------------------------|
| 80 | Univ of CA Davis Eye Ctr            |
| 81 | Utah Valley Eye Center              |
| 82 | Valley Eye Associates               |
| 83 | Vision Quest Medical Center PA      |
| 84 | West Health Inc                     |
| 85 | West Valley Peaks                   |
| 86 | Western Carolina Surgery Center     |
| 87 | Wilshire Center for Ambulatory Surg |

**Supplementary Table 2.** Summary of prediction errors  $\geq 1$  month (30 days) postoperative (all-implanted analysis set)

| Endpoint                                                         | Statistic                              | Clareon<br>All eyes<br>(Total = 1404) | Clareon<br>non-Toric<br>(Total = 1084) | Clareon<br>Toric<br>(Total = 320) |            |
|------------------------------------------------------------------|----------------------------------------|---------------------------------------|----------------------------------------|-----------------------------------|------------|
| Absolute ORA Prediction Error (D)                                | N                                      | 619                                   | 481                                    | 138                               |            |
|                                                                  | Mean (SD)                              | 0.33 (0.32)                           | 0.33 (0.38)                            | 0.31 (0.30)                       |            |
|                                                                  | Median                                 | 0.26                                  | 0.26                                   | 0.26                              |            |
|                                                                  | Min, Max                               | 0.00, 3.82                            | 0.00, 3.82                             | 0.00, 1.76                        |            |
| Absolute Biometry Prediction Error (D)                           | N                                      | 619                                   | 481                                    | 138                               |            |
|                                                                  | Mean (SD)                              | 0.32 (0.30)                           | 0.33 (0.30)                            | 0.32 (0.27)                       |            |
|                                                                  | Median                                 | 0.26                                  | 0.25                                   | 0.28                              |            |
|                                                                  | Min, Max                               | 0.00, 3.65                            | 0.00, 3.65                             | 0.00, 1.54                        |            |
| Abs (ORA Prediction Error) – Abs (Biometry Prediction Error) (D) | N                                      | 619                                   | 481                                    | 138                               |            |
|                                                                  | Mean (SD)                              | 0.01 (0.22)                           | 0.01 (0.24)                            | -0.01 (0.16)                      |            |
|                                                                  | Median                                 | -0.01                                 | 0.00                                   | -0.02                             |            |
|                                                                  | Min, Max                               | -0.58, 1.72                           | -0.58, 1.72                            | -0.34, 0.45                       |            |
| Prediction Error range                                           | N                                      | 619                                   | 481                                    | 138                               |            |
|                                                                  | $\leq -1.00$ D                         | n (%)                                 | 0 (0.0)                                | 0 (0.0)                           | 0 (0.0)    |
|                                                                  | $< -1.00$ D to $\leq -0.75$ D          | n (%)                                 | 0 (0.0)                                | 0 (0.0)                           | 0 (0.0)    |
|                                                                  | $< -0.75$ D to $\leq -0.50$ D          | n (%)                                 | 7 (1.1)                                | 7 (1.5)                           | 0 (0.0)    |
|                                                                  | $< -0.50$ D to $\leq -0.25$ D          | n (%)                                 | 59 (9.5)                               | 49 (10.2)                         | 10 (7.2)   |
|                                                                  | No change ( $> -0.25$ D to $< 0.25$ D) | n (%)                                 | 487 (78.7)                             | 368 (76.5)                        | 119 (86.2) |
|                                                                  | $\geq 0.25$ D to $< 0.50$ D            | n (%)                                 | 53 (8.6)                               | 44 (9.1)                          | 9 (6.5)    |
|                                                                  | $\geq 0.50$ D to $< 0.75$ D            | n (%)                                 | 9 (1.5)                                | 9 (1.9)                           | 0 (0.0)    |
|                                                                  | $\geq 0.75$ D to $< 1.00$ D            | n (%)                                 | 3 (0.5)                                | 3 (0.6)                           | 0 (0.0)    |
|                                                                  | $\geq 1.00$ D                          | n (%)                                 | 1 (0.2)                                | 1 (0.2)                           | 0 (0.0)    |

Abs = absolute value; All eyes = eyes in all-implanted analysis set (AAS); D = diopter; MRSE = Manifest refraction spherical equivalent; N = number of eyes in analysis set; n = number of eyes in category; SD = standard deviation

Percentages are calculated as  $(n/N) * 100$ .

ORA Prediction Error = MRSE after surgery minus ORA predicted residual spherical equivalent

Biometry Prediction Error = MRSE after surgery minus biometry predicted refraction

Clareon non-Toric consists of all eyes in the AAS with a non-Toric IOL implanted

Clareon Toric consists of all eyes in the AAS with a Toric IOL implanted

**Supplementary Table 3.** ORA influence on IOL power selection (Spherical equivalent)

| <b>Group</b>      | <b>Sample size<br/>(eyes)</b> | <b>Surgeon Preop<br/>Calculation Chosen</b> | <b>ORA match<br/>Surgeon Choice</b> | <b>ORA Influenced<br/>Surgeon Choice</b> |
|-------------------|-------------------------------|---------------------------------------------|-------------------------------------|------------------------------------------|
| Clareon All eyes  | 1404                          | 20.9%                                       | 29.1%                               | 49.9%                                    |
| Clareon non-Toric | -                             | 22.8%                                       | 27.9%                               | 49.4%                                    |
| Clareon Toric     | -                             | 14.7%                                       | 33.4%                               | 51.8%                                    |

All eyes = eyes in all-implanted analysis set (AAS)

Surgeon Preop Calculation Chosen = Surgeon preop selection overrides ORA suggestion for IOL power

ORA Match Surgeon Choice = Surgeon preop selection matches ORA suggestion for IOL power

ORA Influenced Surgeon Choice = ORA suggestion overrides surgeon preop selection for IOL power

Clareon non-Toric consists of all eyes in the AAS with a non-Toric IOL implanted

Clareon Toric consists of all eyes in the AAS with a Toric IOL implanted
